# Supplementary material for: Ultrasound-facilitated assembly and disassembly of a pH-sensitive self-assembly peptide
Source: Royal Society of Chemistry journal article supplement (doi:10.1039/c8ra04391d), 2018-01-01
Supplement: c8ra04391d1.pdf [file c8ra04391d1.pdf]

## Supporting Figure

### 1. K<sub>3</sub>C<sub>6</sub>SPD

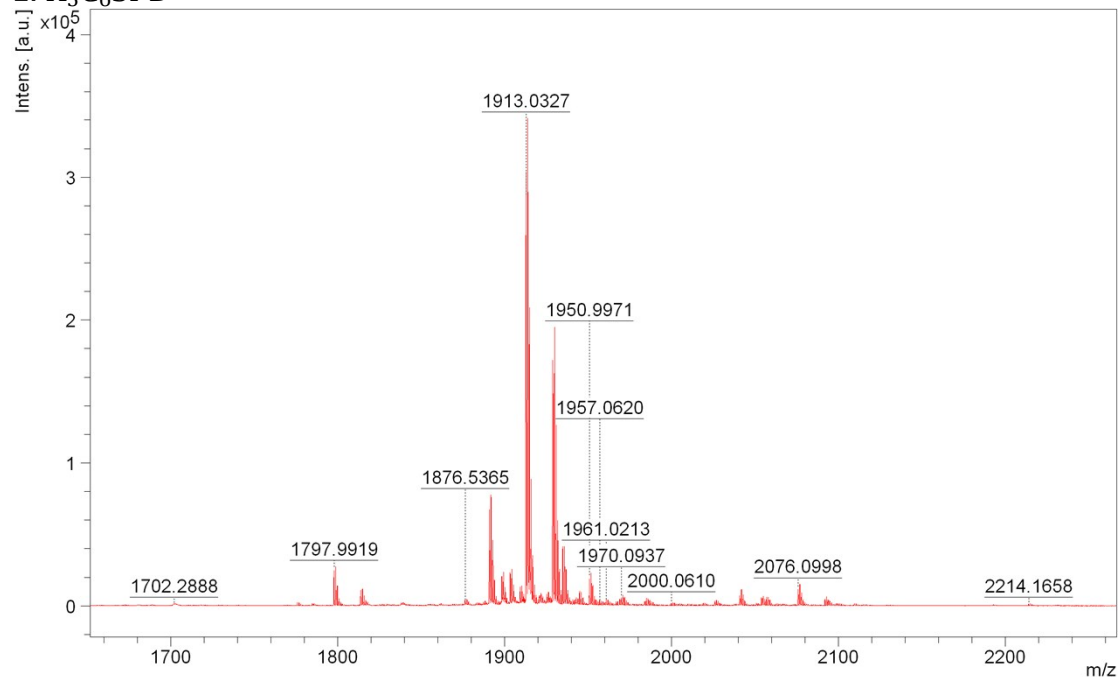

Theoretical MW: 1891

Measured MW: 1891 ( $[M-H+Na^+]=1913$ )

### 2. F20H

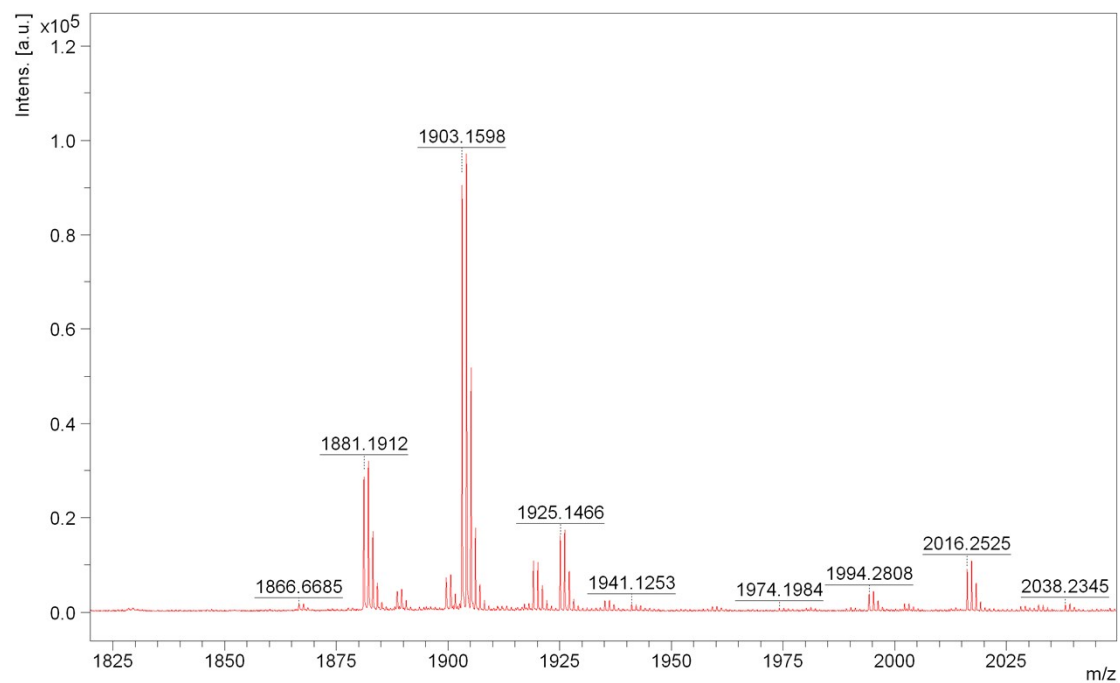

Theoretical MW: 1881

Measured MW: 1881 ( $[M-H+Na^+]=1903$ )

Fig. S1 MALDI-mass spectra of peptide K3C6SPD and F20H.
